# Supplementary material
Source: Springer Nature journal article supplement (https://www.springermedizin.de/resource/supplementary/12903_2014_448_MOESM1_ESM.pdf/9516714)
Supplement: MOESM1 [file 9516714]

**Children's Fear Survey Schedule-Dental Subscale**

|                                                      | <b>Not<br/>afraid at<br/>all</b> | <b>A little<br/>afraid</b> | <b>A fair<br/>amount<br/>afraid</b> | <b>Pretty<br/>much<br/>afraid</b> | <b>Very<br/>afraid</b> |
|------------------------------------------------------|----------------------------------|----------------------------|-------------------------------------|-----------------------------------|------------------------|
| 1. Dentists                                          | _____                            | _____                      | _____                               | _____                             | _____                  |
| 2. Doctors                                           | _____                            | _____                      | _____                               | _____                             | _____                  |
| 3. Injections                                        | _____                            | _____                      | _____                               | _____                             | _____                  |
| 4. Having someone examine your mouth                 | _____                            | _____                      | _____                               | _____                             | _____                  |
| 5. Having to open your mouth                         | _____                            | _____                      | _____                               | _____                             | _____                  |
| 6. Having a stranger touch you                       | _____                            | _____                      | _____                               | _____                             | _____                  |
| 7. Having somebody look at you                       | _____                            | _____                      | _____                               | _____                             | _____                  |
| 8. The dentist drilling                              | _____                            | _____                      | _____                               | _____                             | _____                  |
| 9. The sight of the dentist drilling                 | _____                            | _____                      | _____                               | _____                             | _____                  |
| 10. The noise of the dentist drilling                | _____                            | _____                      | _____                               | _____                             | _____                  |
| 11. Having somebody put instruments in<br>your mouth | _____                            | _____                      | _____                               | _____                             | _____                  |
| 12. Choking                                          | _____                            | _____                      | _____                               | _____                             | _____                  |
| 13. Having to go to the hospital                     | _____                            | _____                      | _____                               | _____                             | _____                  |
| 14. People in white uniforms                         | _____                            | _____                      | _____                               | _____                             | _____                  |
| 15. Having the nurse clean your teeth                | _____                            | _____                      | _____                               | _____                             | _____                  |
